# Supplementary material
Source: PubMed Central journal article supplement (PMC10393083)

## Supplemental Digital Content 1. Derivation of Study Population

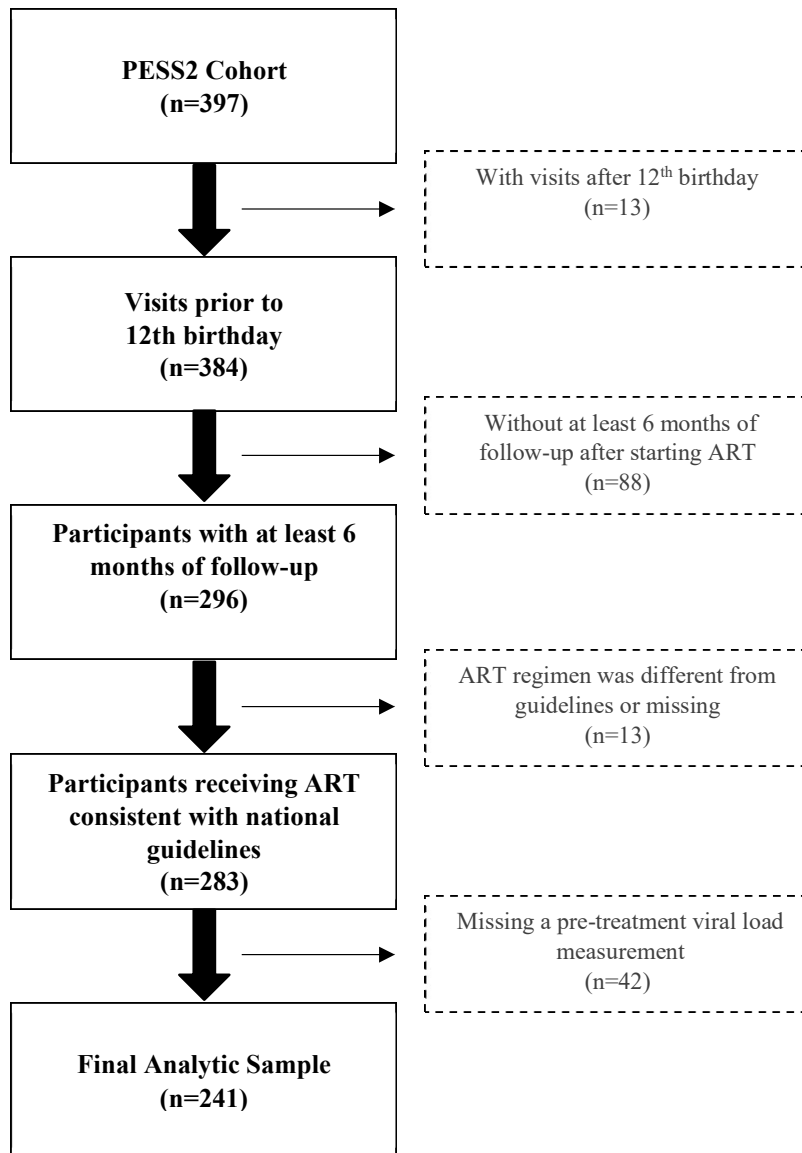

Supplement: NIHMS1901100-supplement-Derivation_of_Study_Population.pdf [file NIHMS1901100-supplement-Derivation_of_Study_Population.pdf]
